# Supplementary material
Source: Royal Society of Chemistry journal article supplement (doi:10.1039/d6mh00636a)
Supplement: d6mh00636a1.pdf [file d6mh00636a1.pdf]

# Piezophototronic Modulation in 2D Ruddlesden–Popper Perovskites: A Pathway to Strain–Light Synergistic Self-Powered Intelligent Sensing

Abhirup Chatterjee<sup>1</sup>, Sreya Das<sup>1</sup>, Souvik Bhattacharjee<sup>1</sup>, Soumen Maiti<sup>2</sup>, Tufan Paul<sup>3</sup>, Pulak

Pal<sup>1</sup> and Kalyan Kumar Chattopadhyay<sup>1,3\*</sup>

<sup>1</sup>Department of Physics, Jadavpur University, Kolkata 700032

<sup>2</sup>Department of Physics, St. Thomas College of Engineering & Technology, Kolkata

700023

<sup>3</sup>School of Materials Science and Nanotechnology, Jadavpur University, Kolkata 700032

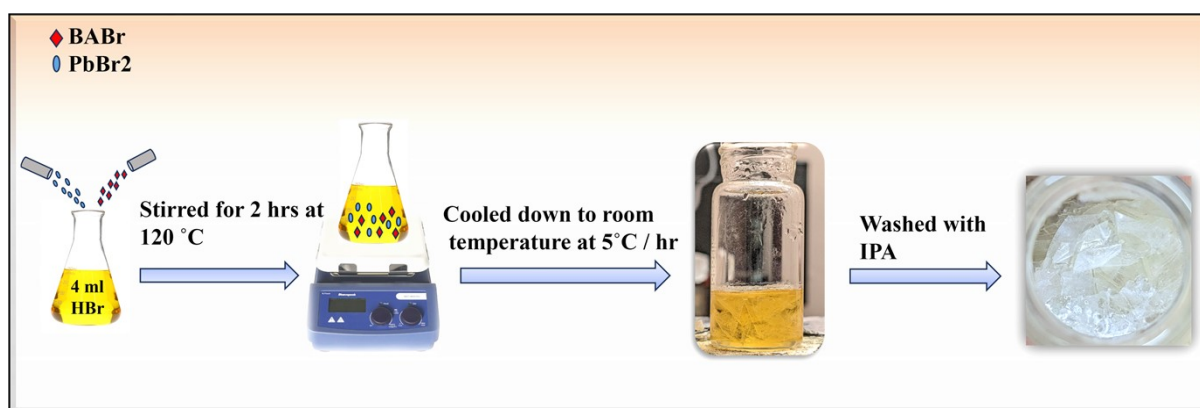

**Fig. S1:** Schematic diagram of synthesis process of  $BA_2PbBr_4$  perovskites via solution-based method.

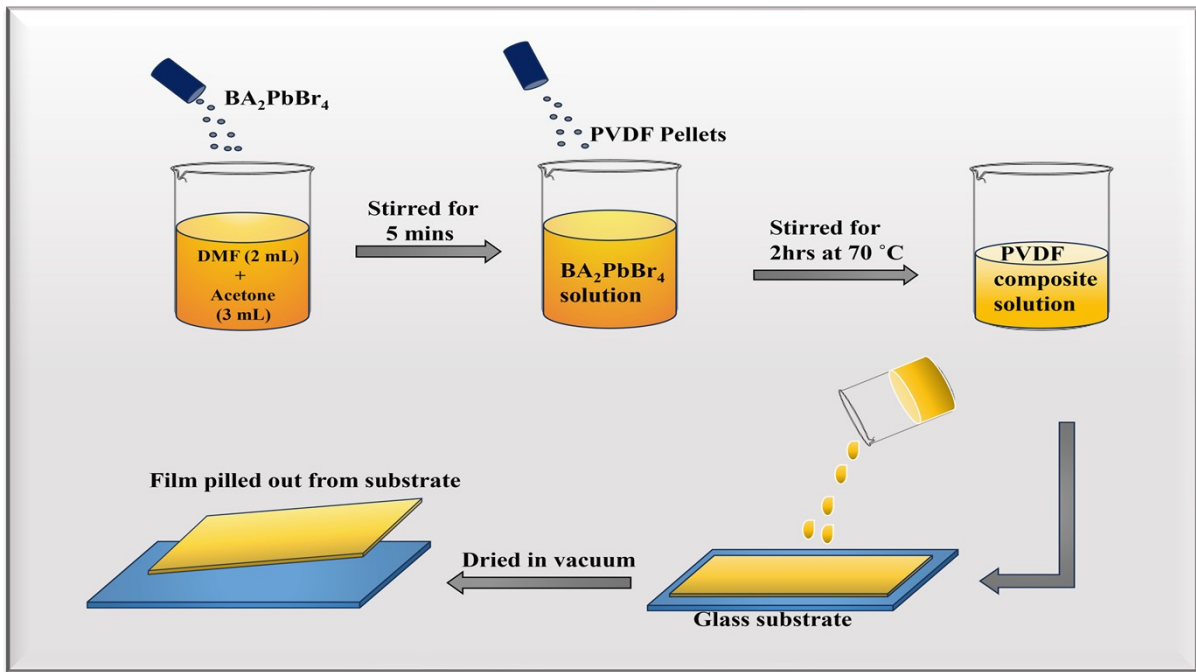

**Fig. S2:** Schematic diagram of synthesis process of PVDF/ BA<sub>2</sub>PbBr<sub>4</sub> composite film.

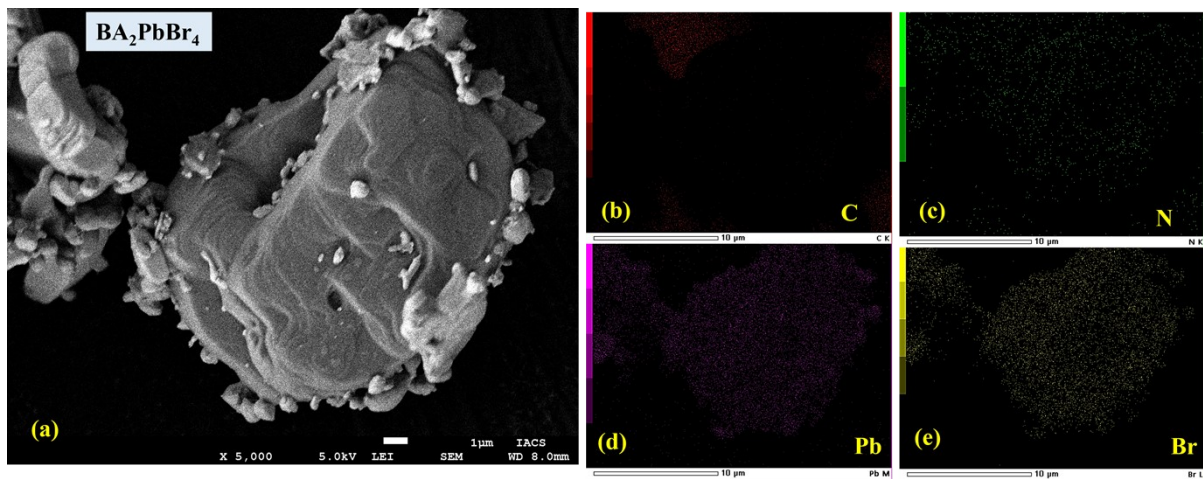

**Fig. S3:** (a) SEM image of BA<sub>2</sub>PbBr<sub>4</sub>, (b-e) EDX elemental mapping of the constituent elements of BA<sub>2</sub>PbBr<sub>4</sub> perovskite

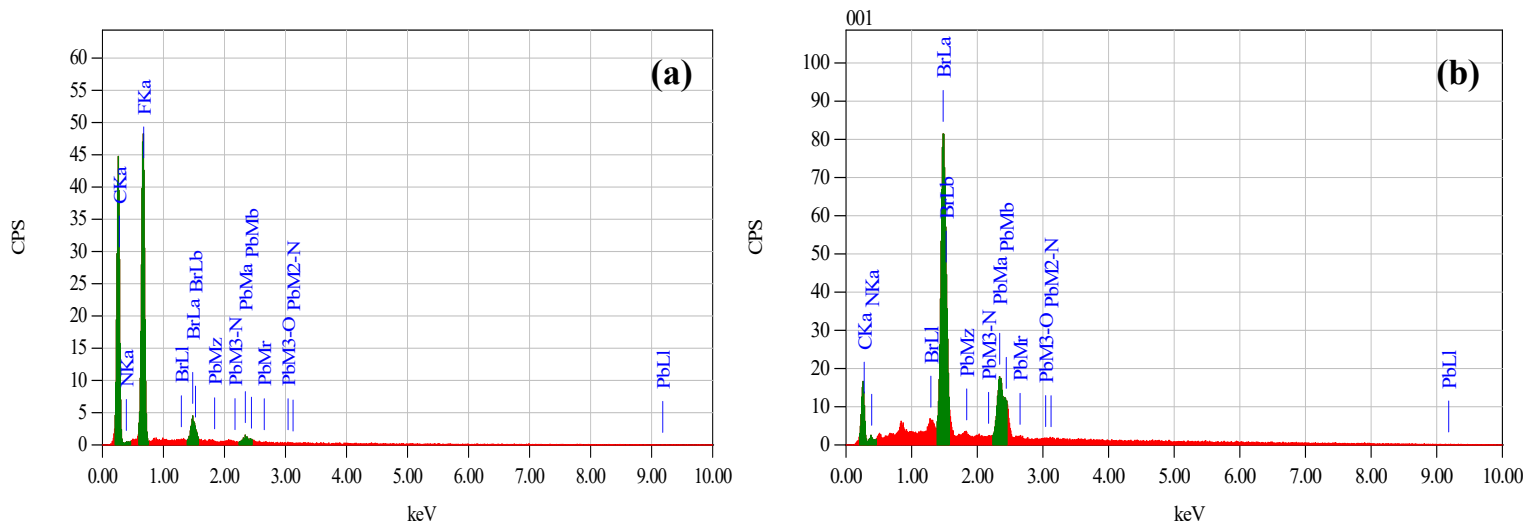

**Fig. S4:** (a, b) EDX spectra of  $\text{BA}_2\text{PbBr}_4$  and PVDF/  $\text{BA}_2\text{PbBr}_4$  composite film

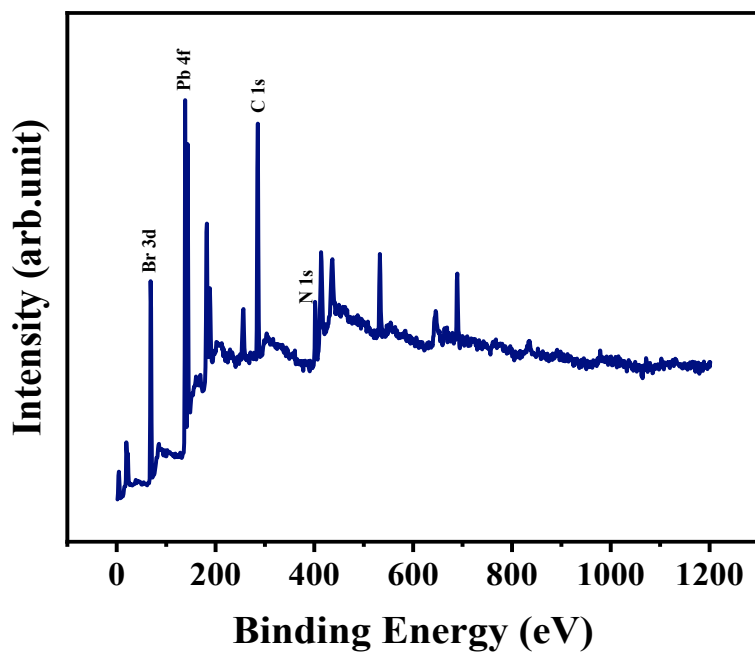

**Fig. S5:** XPS survey spectra of  $\text{BA}_2\text{PbBr}_4$  showing all the constituent elements.

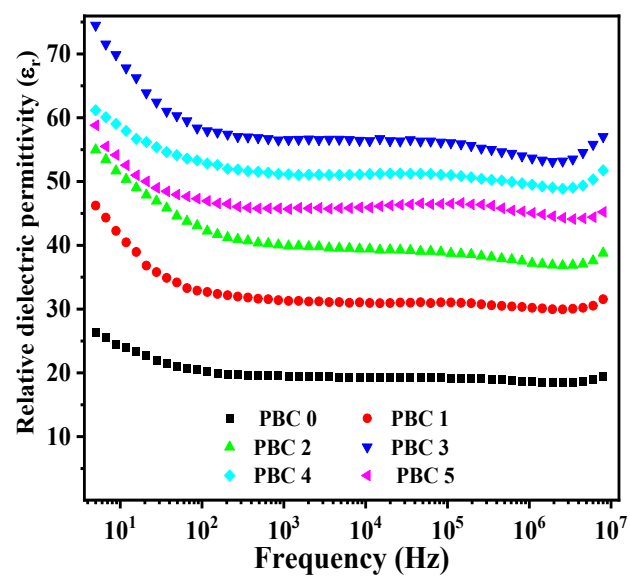

*Fig. S6: Frequency dependent relative dielectric permittivity of PVDF/  $BA_2PbBr_4$  composites.*

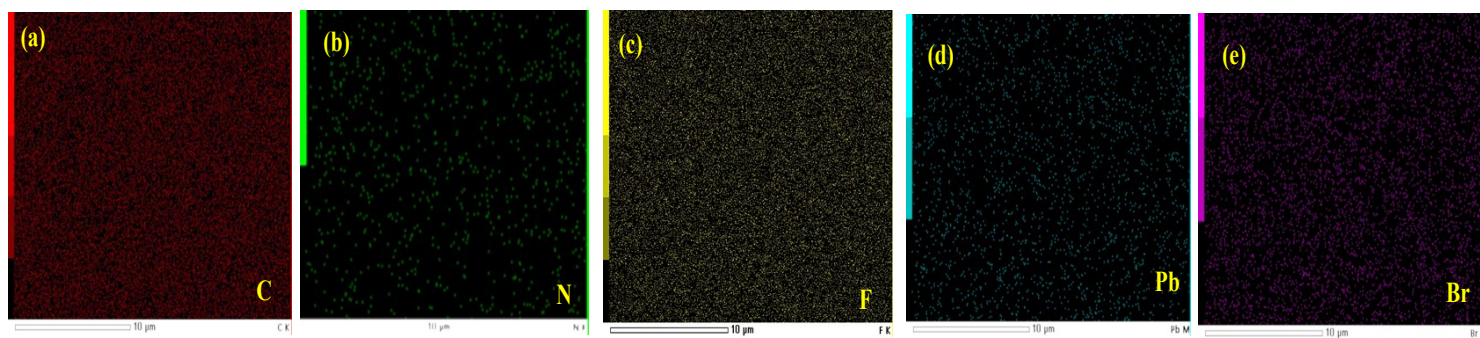

*Fig. S7 : (a-e) EDX elemental mapping of the constituent elements (C, N, F, Pb and Br) of PBC3.*

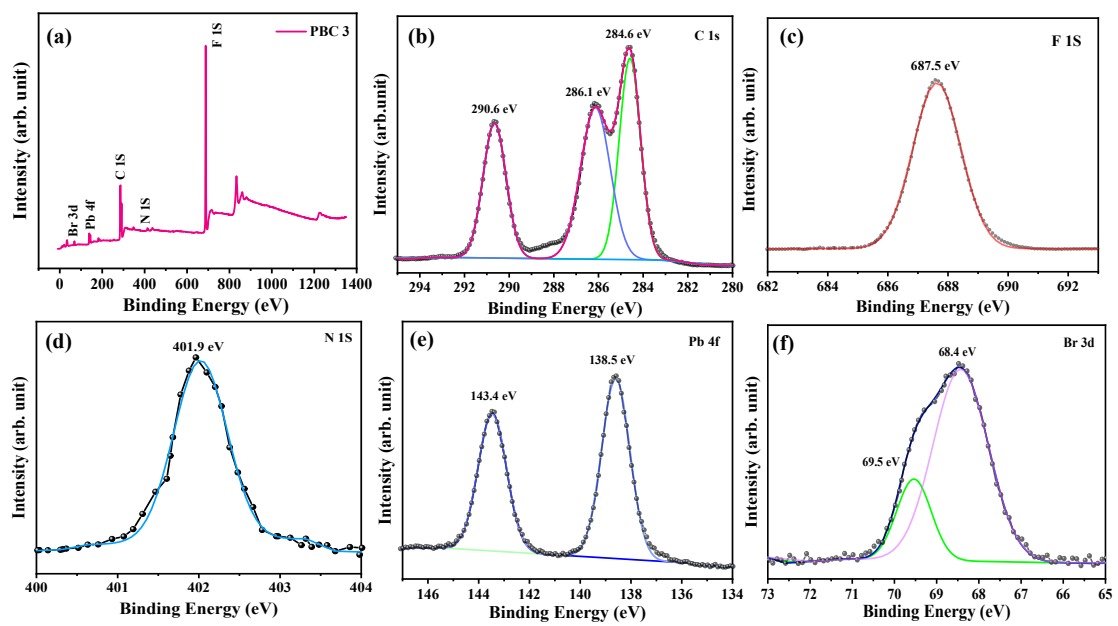

**Fig. S8 :** Core level XPS spectra of PBC 3: (a) Survey spectra, (b) C, (c) F, (d) N, (e) Pb, (f) Br.

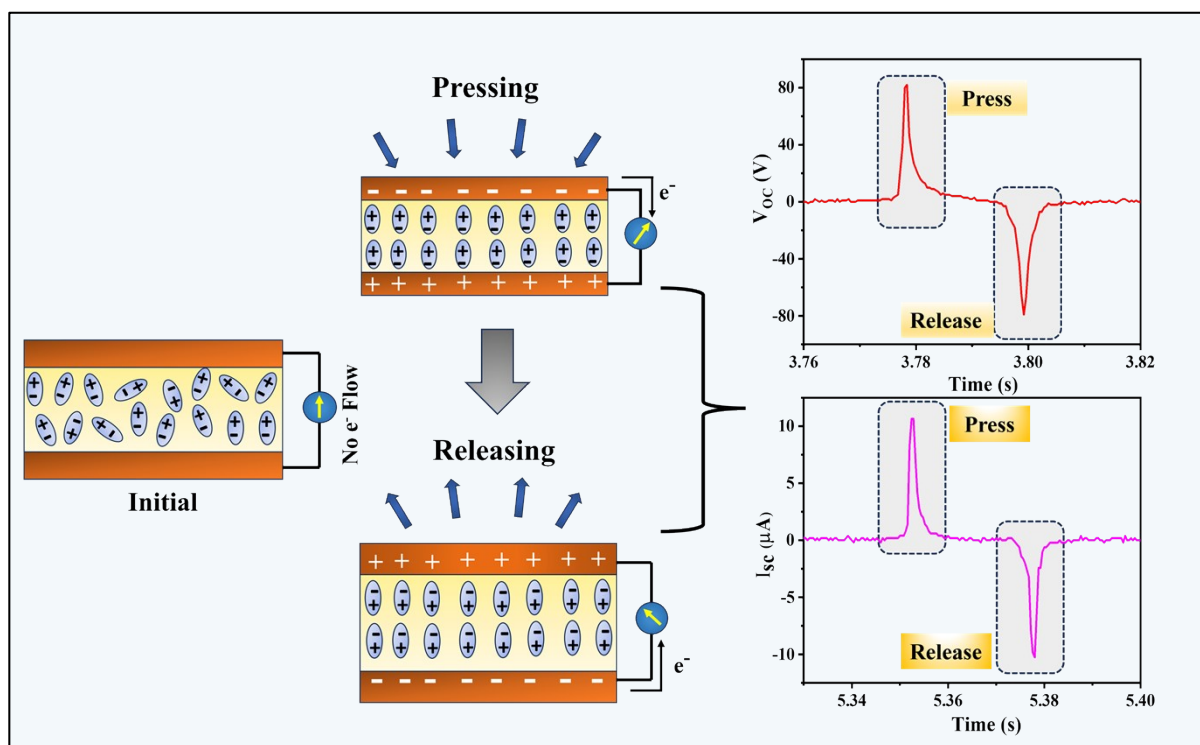

**Fig. S9** : Schematic of the working mechanism of the nanogenerator device during initial, pressing and releasing condition with an enlarged view of open circuit voltage and short circuit current during pressing and releasing.

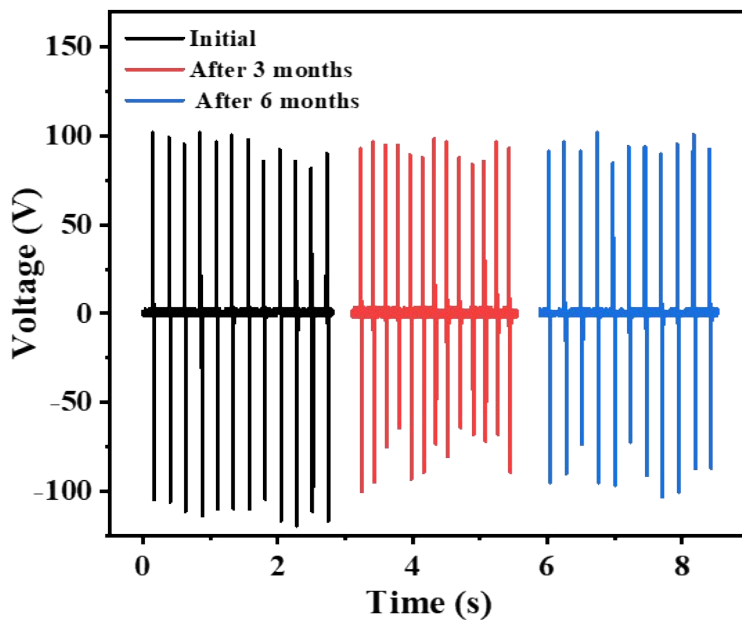

*Fig. S10: Output voltage data on first day, after 3 months and after 6 months.*

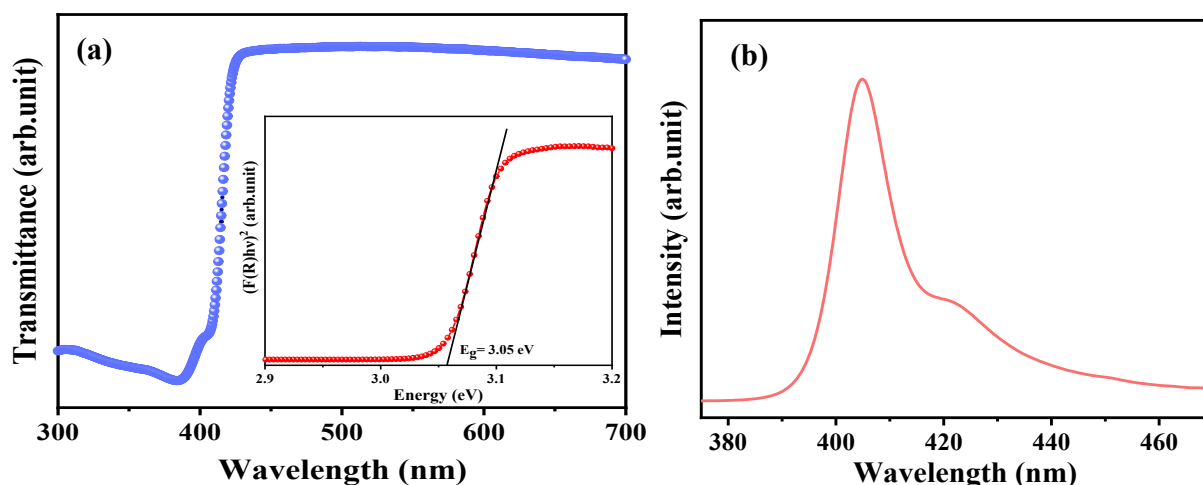

*Fig. S11: (a) Tauc plots showing band gap, (b) PL spectra of of PBC 3 film.*

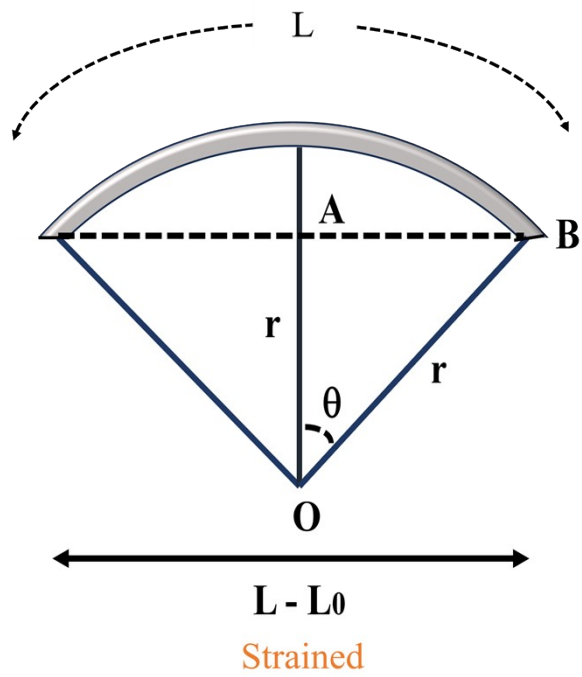

**Fig. S12:** Schematic representation for the strain calculation of the film in strained condition

The equation (3) mentioned in the main manuscript is derived as:

In Fig. S10,  $\Delta OAB$  gives the relation,

$$L = r \cdot (2\theta)$$

$$\sin\theta = \frac{(L - L_0)/2}{r}$$

$$\text{or, } \sin\left(\frac{L}{2r}\right) = \frac{L - L_0}{2r}$$

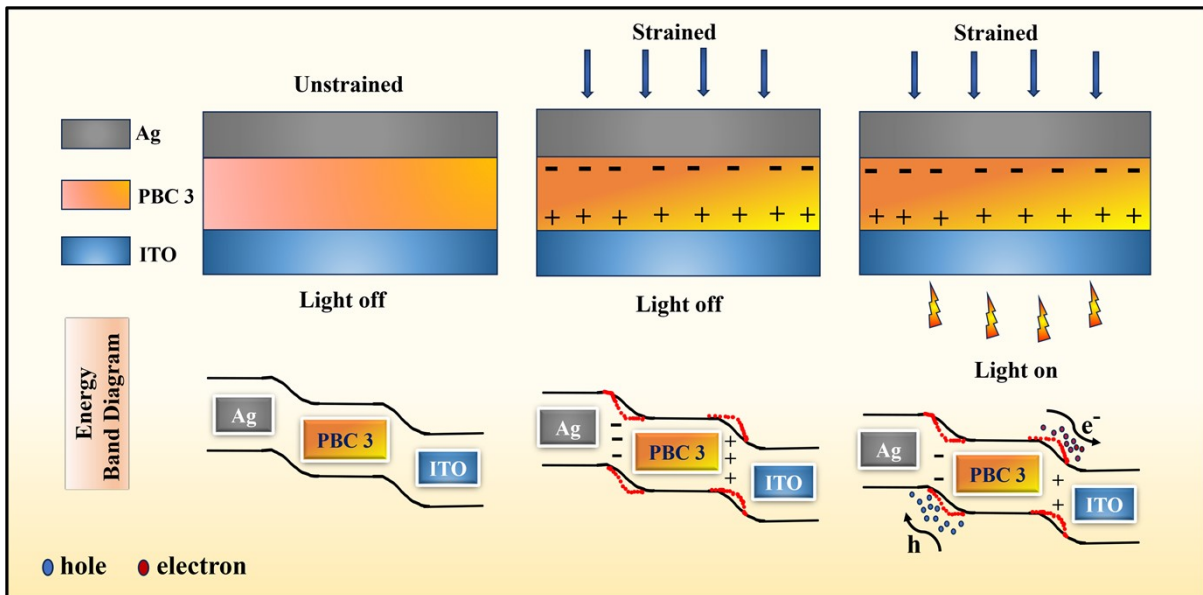

*Fig. S13 : Schematic structure and band diagram of the piezophototronic device under different mechanical and optical conditions.*
